# Supplementary material for: Phylogeny Reveals Novel HipA-Homologous Kinase Families and Toxin-Antitoxin Gene Organizations
Source: PubMed Central journal article supplement (PMC8262856; doi:10.1128/mbio.01058-21), 2021-06-01

Figure S5

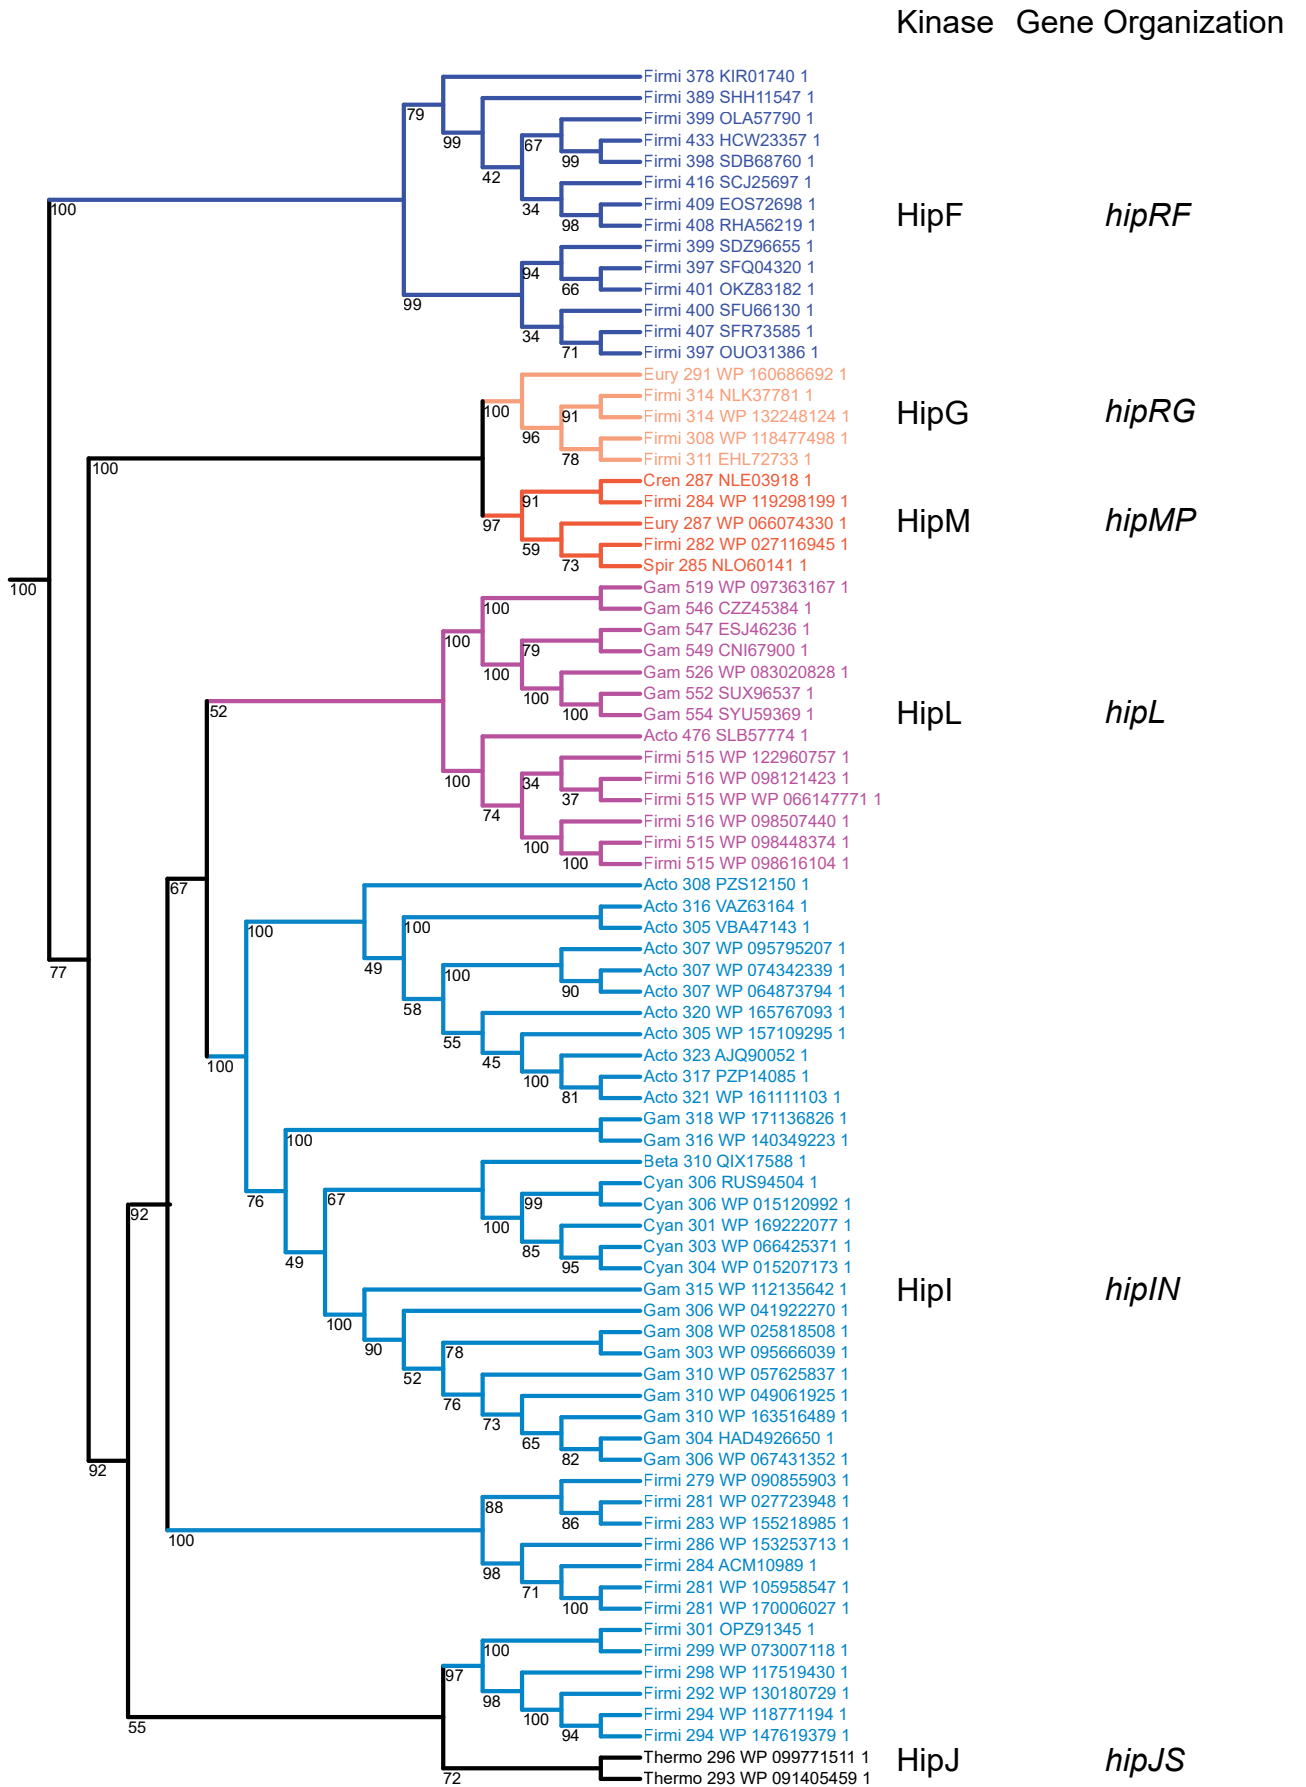

Supplement: mbio.01058-21-sf005.pdf [file mbio.01058-21-sf005.pdf]
